# Supplementary material
Source: HighWire-hosted journal article supplement (https://www.genetics.org/content/suppl/2017/08/28/genetics.117.300211)
Supplement: FigureS8.pdf [file FigureS8.pdf]

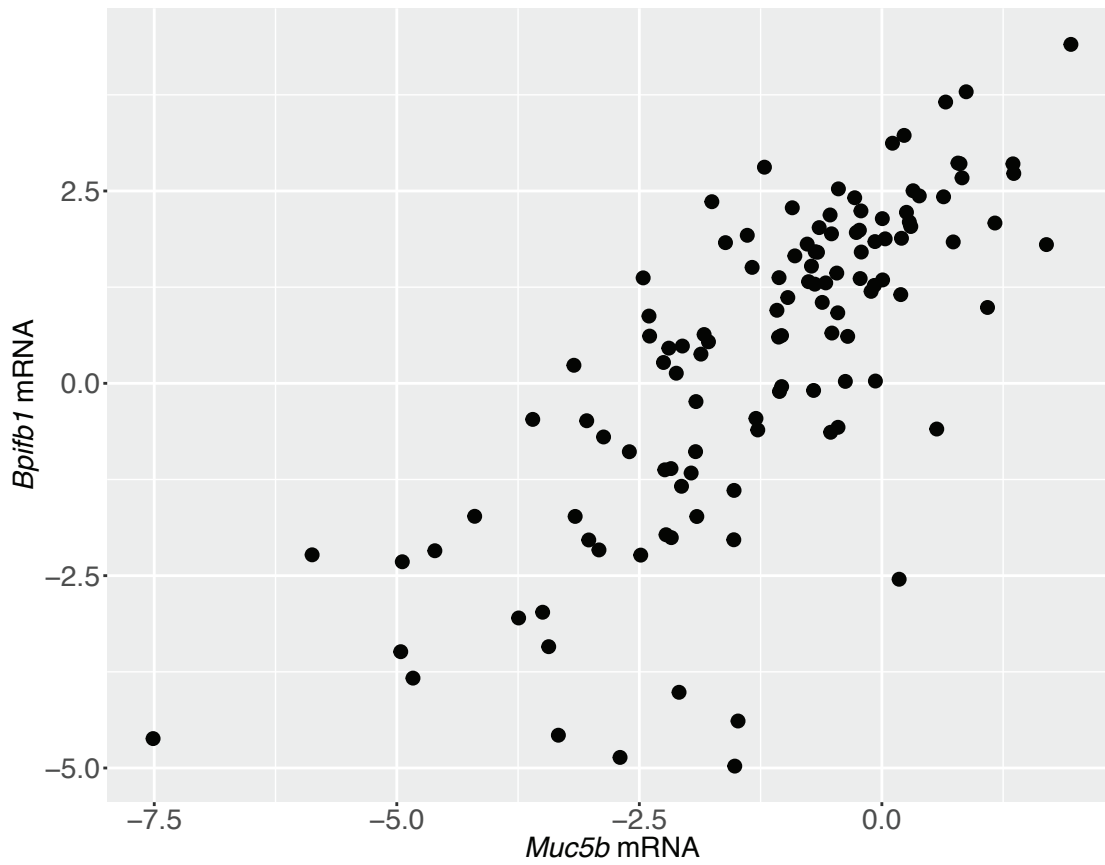

**Figure S8. Pairwise correlation of *Muc5b* and *Bpifb1* mRNA in preCC mice.** Pearson correlation  $r = 0.75$  ( $P < 2.2 \times 10^{-6}$ ) of mRNA RT-qPCR negative delta Ct values of expression normalized to *Rsp20*. Gene expression quantified with assays unbiased to CC founder strain sequence.
